# Supplementary material
Source: MDPI journal article supplement (https://www.mdpi.com/2311-5637/4/2/22)
Supplement: s1 [file s1]

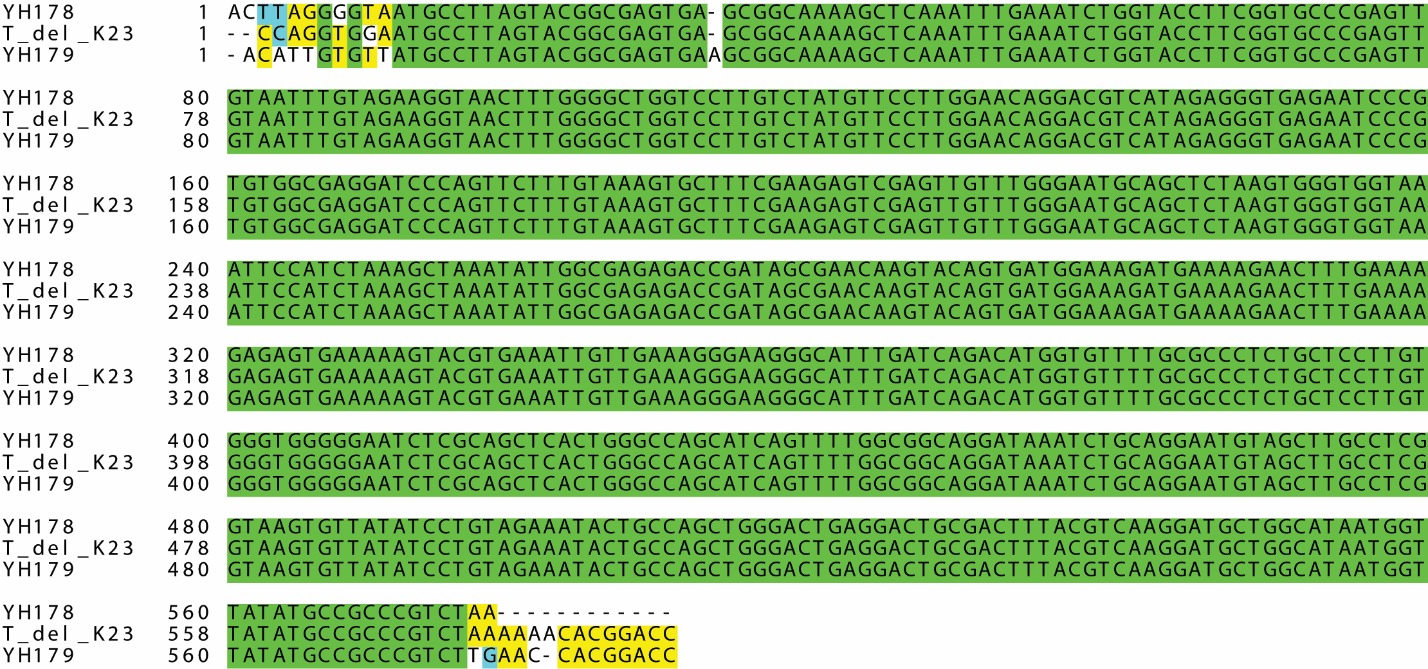


**Supplementary Figure 1.** Full sequence alignment of the D1/D2 region from *Torulaspora delbrueckii* strains YH178, YH179, and T_del_K23 (GenBank accession KP852445.1). Green: fully conserved; yellow: conserved among two sequences; blue: similarity (pyrimidines); dashes: sequence gaps due to indels. See Figure 1B and the main text for additional details.
